# Supplementary material
Source: publisher figshare collection journal article supplement (https://future-science-group.figshare.com/articles/dataset/_/22332787)

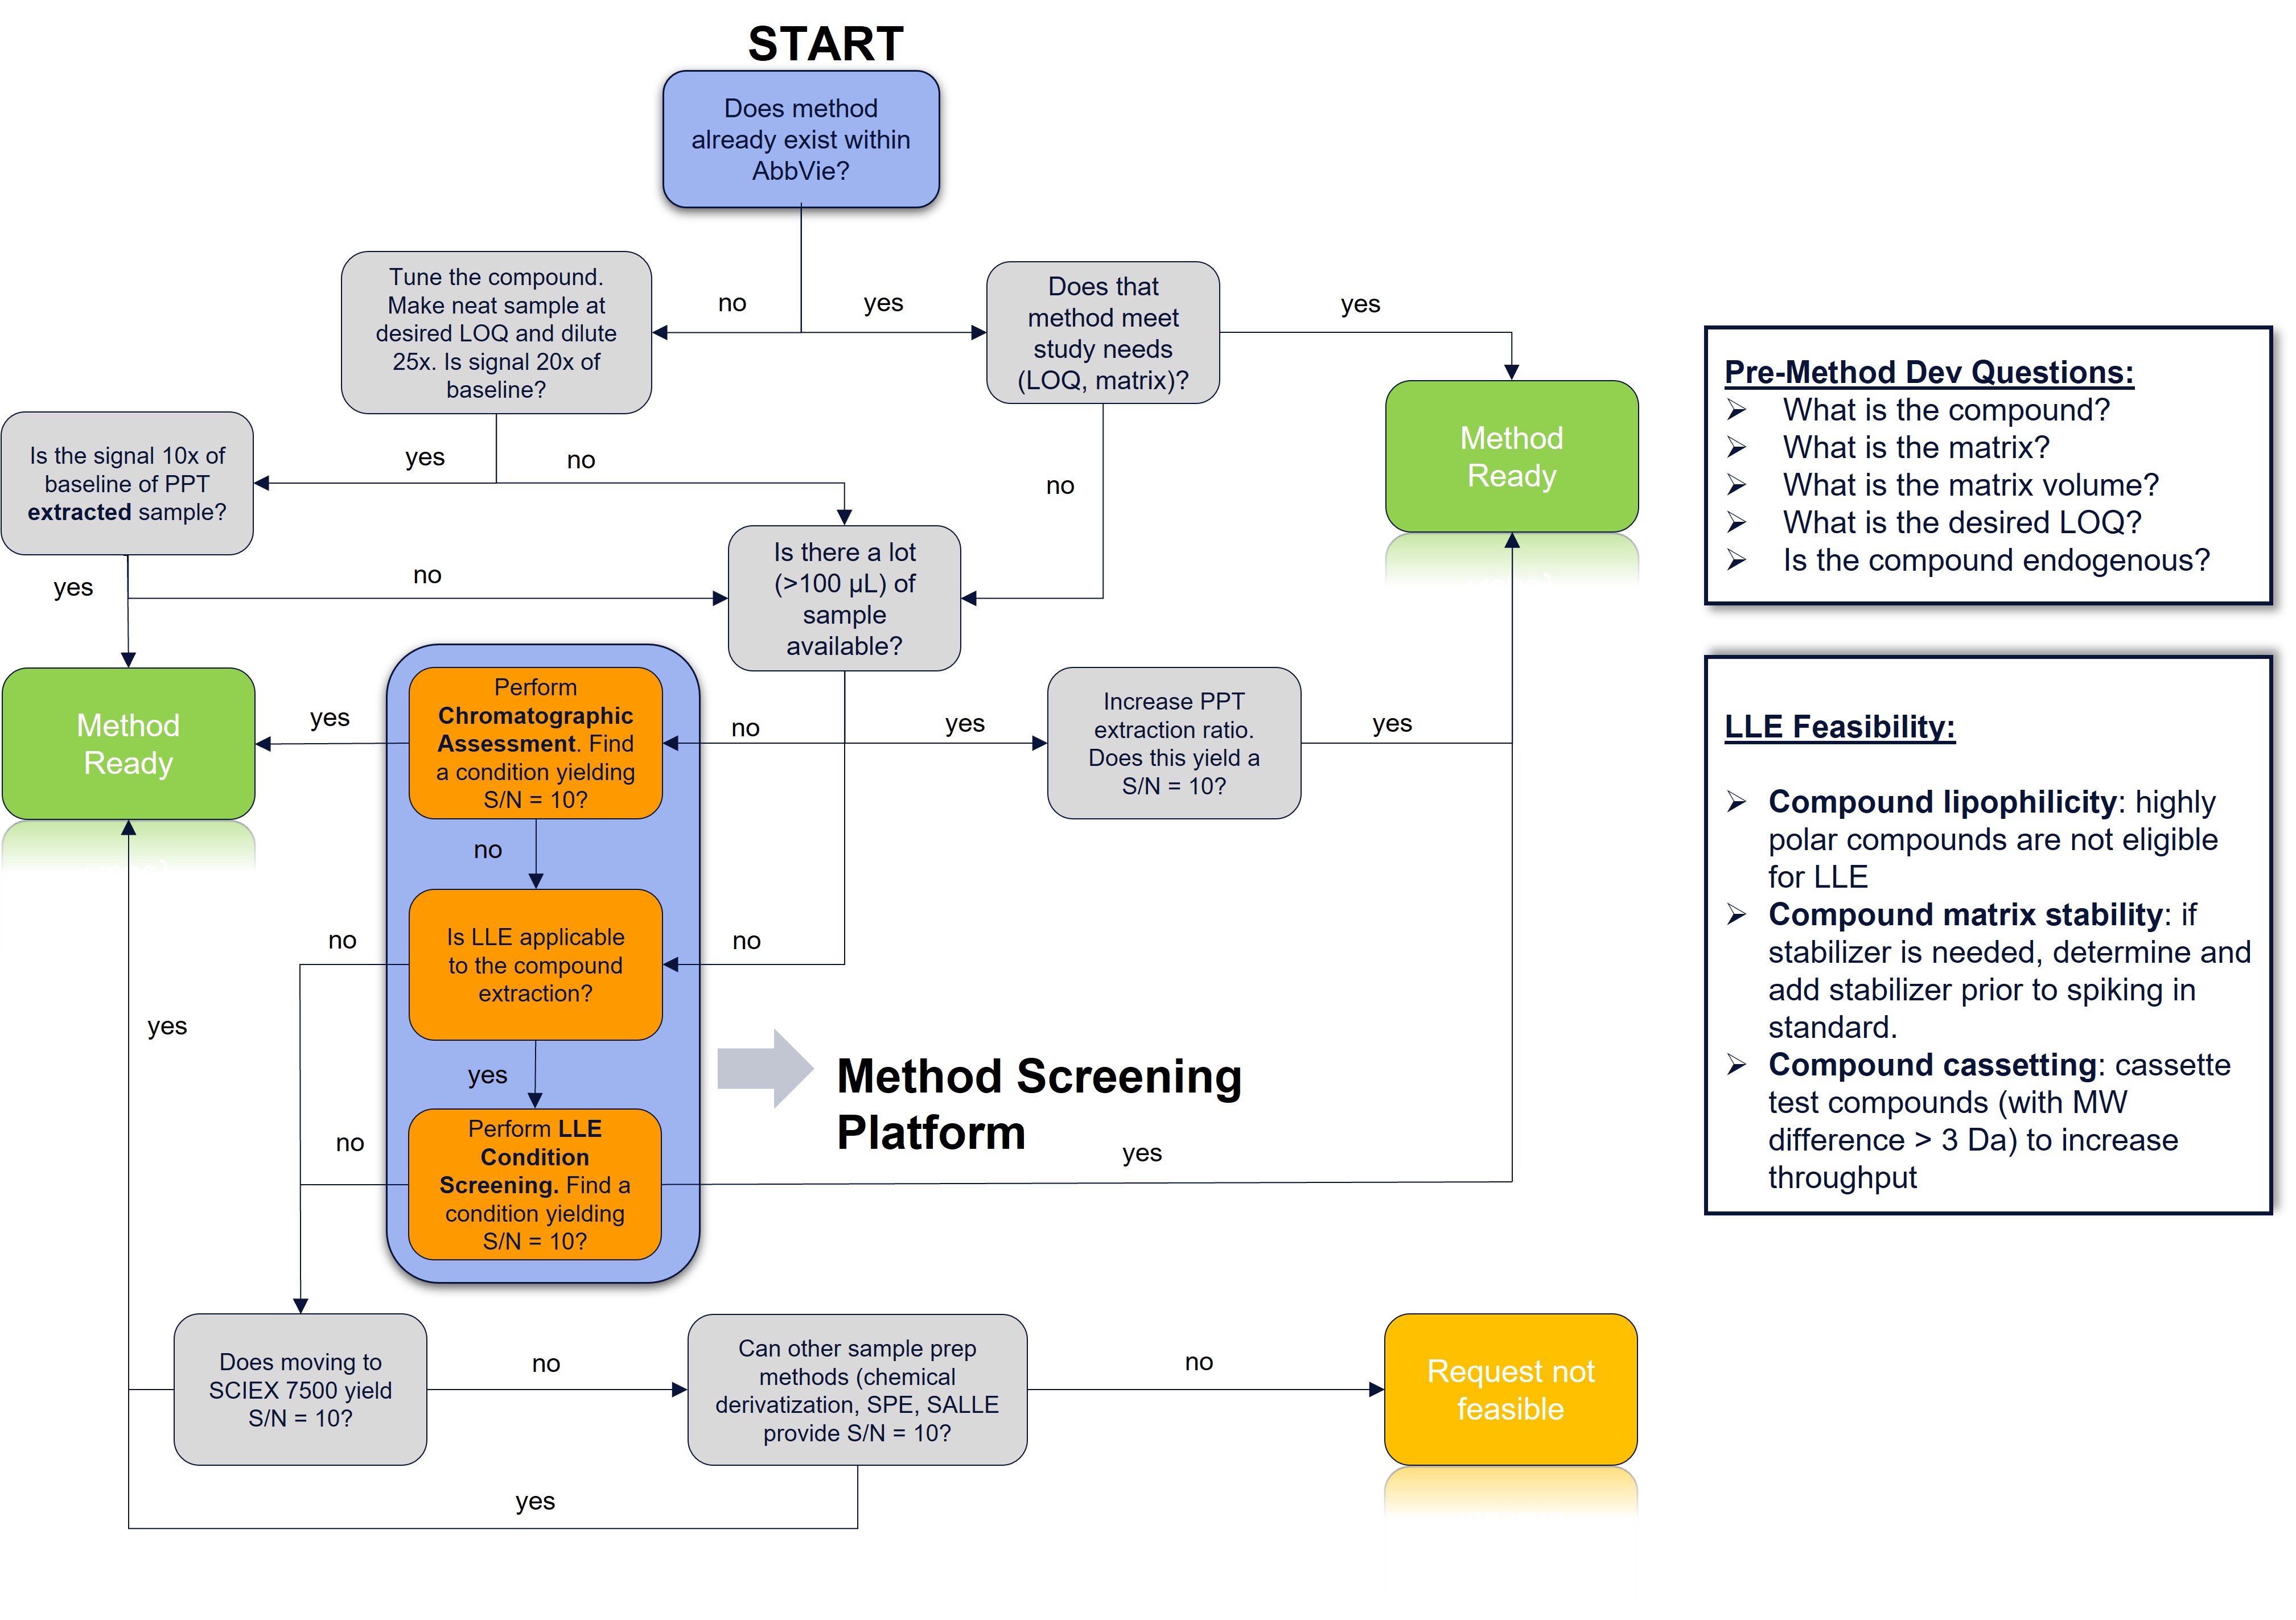


**Figure S3. Method feasibility decision tree for method development and optimization**

Supplement: Supplementary file 1 [file 1]
